# Supplementary material for: Impact of Skeletal Muscle Loss and Visceral Obesity Measured Using Serial CT on the Prognosis of Operable Breast Cancers in Asian Patients
Source: PubMed Central journal article supplement — Korean J Radiol. 2022 Jan 6;23(2):159–71. doi: 10.3348/kjr.2020.1475 (PMC8814696; doi:10.3348/kjr.2020.1475), 2022-01-06
Supplement: kjr-23-159-s001.pdf [file kjr-23-159-s001.pdf]

## SUPPLEMENT

### Subgroup Analysis

Subgroup analysis was performed based on clinicopathological factors, including menstrual status, T and N stages, histologic grade, estrogen receptor (ER), human epidermal growth factor receptor 2 (HER2), and Ki-67, to evaluate the association of baseline, time-varying, and delta value of skeletal muscle index (SMI) and visceral adipose tissue area (VAT) with disease-free survival (DFS).

The results of subgroup analysis are shown in Supplementary Table 1. The baseline VAT was significantly associated with DFS (hazard ratio [HR], 1.019; 95% confidence interval [CI], 1.003–1.034;  $p = 0.017$ ) in the histologic grade 1 subgroup. Time-varying SMI and VAT were also associated with DFS in this subgroup (HR, 0.861; 95% CI: 0.774–0.959;  $p = 0.007$  and HR, 1.018; 95% CI, 1.002–1.034;  $p = 0.032$ , respectively). The positive delta VAT was significantly associated with worse DFS in the HER2-positive subgroup (HR, 1.053; 95% CI, 1.011–1.096;  $p = 0.013$ ). The time-varying VAT was significantly associated with DFS in the low Ki-67 subgroup (HR, 0.982; 95% CI, 0.968–0.996;  $p = 0.012$ ). Other subgroup analyses showed no significant association between body composition parameters and recurrence.

**Supplementary Table 1. Subgroup Analysis of SMI and VAT associated with Disease-Free Survival**

| Subgroup Variable |               | Predictor    | Type               | n     | HR    | 95% CI |       | P     |
|-------------------|---------------|--------------|--------------------|-------|-------|--------|-------|-------|
| Histologic grade  | 1             | SMI          | Baseline*          | 212   | 0.835 | 0.680  | 1.026 | 0.086 |
|                   |               |              | Time-varying*      | 212   | 0.861 | 0.774  | 0.959 | 0.007 |
|                   |               |              | Delta <sup>†</sup> | 212   | 0.679 | 0.362  | 1.271 | 0.226 |
|                   |               | VAT          | Baseline*          | 212   | 1.019 | 1.003  | 1.034 | 0.017 |
|                   |               |              | Time-varying*      | 212   | 1.018 | 1.002  | 1.034 | 0.032 |
|                   |               |              | Delta <sup>†</sup> | 212   | 0.996 | 0.969  | 1.024 | 0.778 |
|                   | 2             | SMI          | Baseline           | 263   | 0.955 | 0.880  | 1.037 | 0.273 |
|                   |               |              | Time-varying       | 263   | 0.971 | 0.901  | 1.045 | 0.428 |
|                   |               |              | Delta              | 255   | 0.920 | 0.744  | 1.137 | 0.441 |
|                   |               | VAT          | Baseline           | 263   | 0.997 | 0.987  | 1.008 | 0.580 |
|                   |               |              | Time-varying       | 263   | 1.000 | 0.992  | 1.007 | 0.964 |
|                   |               |              | Delta              | 255   | 1.005 | 0.985  | 1.025 | 0.653 |
| 3                 | SMI           | Baseline     | 152                | 1.009 | 0.919 | 1.108  | 0.843 |       |
|                   |               | Time-varying | 152                | 1.022 | 0.949 | 1.099  | 0.569 |       |
|                   |               | Delta        | 145                | 0.906 | 0.713 | 1.152  | 0.421 |       |
|                   | VAT           | Baseline     | 152                | 1.000 | 0.990 | 1.011  | 0.972 |       |
|                   |               | Time-varying | 152                | 1.001 | 0.992 | 1.011  | 0.782 |       |
|                   |               | Delta        | 145                | 1.000 | 0.980 | 1.020  | 0.986 |       |
| HER2              | Negative      | SMI          | Baseline           | 493   | 0.949 | 0.887  | 1.016 | 0.132 |
|                   |               |              | Time-varying       | 493   | 0.972 | 0.921  | 1.026 | 0.308 |
|                   |               |              | Delta              | 481   | 0.883 | 0.739  | 1.056 | 0.174 |
|                   |               | VAT          | Baseline           | 493   | 0.998 | 0.991  | 1.006 | 0.697 |
|                   |               |              | Time-varying       | 493   | 1.000 | 0.994  | 1.007 | 0.938 |
|                   |               |              | Delta              | 481   | 0.996 | 0.980  | 1.012 | 0.630 |
|                   | Positive      | SMI          | Baseline           | 134   | 1.166 | 1.001  | 1.358 | 0.048 |
|                   |               |              | Time-varying       | 134   | 1.104 | 0.988  | 1.233 | 0.081 |
|                   |               |              | Delta              | 131   | 1.237 | 0.848  | 1.804 | 0.269 |
|                   |               | VAT          | Baseline           | 134   | 1.026 | 1.000  | 1.052 | 0.051 |
|                   |               |              | Time-varying       | 134   | 1.011 | 0.997  | 1.025 | 0.110 |
|                   |               |              | Delta              | 131   | 1.053 | 1.011  | 1.096 | 0.013 |
| Ki-67             | < 20%         | SMI          | Baseline           | 283   | 0.876 | 0.715  | 1.072 | 0.198 |
|                   |               |              | Time-varying       | 283   | 0.895 | 0.771  | 1.037 | 0.140 |
|                   |               |              | Delta              | 279   | 0.811 | 0.493  | 1.334 | 0.409 |
|                   |               | VAT          | Baseline           | 283   | 0.989 | 0.968  | 1.011 | 0.335 |
|                   |               |              | Time-varying       | 283   | 0.982 | 0.968  | 0.996 | 0.012 |
|                   |               |              | Delta              | 279   | 1.005 | 0.971  | 1.040 | 0.778 |
|                   | ≥ 20%         | SMI          | Baseline           | 344   | 0.976 | 0.919  | 1.036 | 0.428 |
|                   |               |              | Time-varying       | 344   | 0.989 | 0.940  | 1.041 | 0.677 |
|                   |               |              | Delta              | 333   | 0.913 | 0.766  | 1.087 | 0.305 |
|                   |               | VAT          | Baseline           | 344   | 1.001 | 0.994  | 1.008 | 0.853 |
|                   |               |              | Time-varying       | 344   | 1.003 | 0.996  | 1.009 | 0.371 |
|                   |               |              | Delta              | 333   | 1.001 | 0.987  | 1.014 | 0.931 |
| Menstrual status  | Postmenopause | SMI          | Baseline*          | 372   | 0.969 | 0.900  | 1.043 | 0.396 |
|                   |               |              | Time-varying*      | 372   | 0.990 | 0.936  | 1.047 | 0.713 |
|                   |               |              | Delta <sup>†</sup> | 361   | 0.830 | 0.676  | 1.018 | 0.074 |
|                   |               | VAT          | Baseline*          | 372   | 1.000 | 0.992  | 1.008 | 0.963 |
|                   |               |              | Time-varying*      | 372   | 1.001 | 0.994  | 1.008 | 0.766 |
|                   |               |              | Delta <sup>†</sup> | 361   | 0.999 | 0.983  | 1.016 | 0.921 |
|                   | Premenopause  | SMI          | Baseline           | 255   | 0.959 | 0.865  | 1.063 | 0.425 |
|                   |               |              | Time-varying       | 255   | 0.974 | 0.887  | 1.070 | 0.582 |
|                   |               |              | Delta              | 251   | 1.014 | 0.779  | 1.319 | 0.919 |
|                   |               | VAT          | Baseline           | 255   | 0.997 | 0.981  | 1.013 | 0.697 |
|                   |               |              | Time-varying       | 255   | 1.001 | 0.988  | 1.014 | 0.896 |
|                   |               |              | Delta              | 251   | 1.011 | 0.988  | 1.034 | 0.349 |
| T stage           | 1             | SMI          | Baseline           | 405   | 0.955 | 0.865  | 1.054 | 0.360 |
|                   |               |              | Time-varying       | 405   | 0.979 | 0.908  | 1.054 | 0.569 |
|                   |               |              | Delta              | 397   | 1.012 | 0.803  | 1.275 | 0.921 |
|                   |               | VAT          | Baseline           | 405   | 0.999 | 0.987  | 1.010 | 0.825 |
|                   |               |              | Time-varying       | 405   | 1.002 | 0.995  | 1.009 | 0.587 |
|                   |               |              | Delta              | 397   | 1.012 | 0.993  | 1.032 | 0.214 |
|                   | 2 or 3        | SMI          | Baseline           | 222   | 0.965 | 0.895  | 1.041 | 0.357 |
|                   |               |              | Time-varying       | 222   | 0.991 | 0.927  | 1.060 | 0.801 |
|                   |               |              | Delta              | 215   | 0.801 | 0.643  | 0.999 | 0.049 |
|                   |               | VAT          | Baseline           | 222   | 0.998 | 0.990  | 1.007 | 0.695 |
|                   |               |              | Time-varying       | 222   | 0.998 | 0.991  | 1.006 | 0.678 |
|                   |               |              | Delta              | 215   | 0.994 | 0.977  | 1.011 | 0.493 |
| N stage           | 0             | SMI          | Baseline           | 400   | 0.988 | 0.911  | 1.071 | 0.772 |
|                   |               |              | Time-varying       | 400   | 1.001 | 0.941  | 1.064 | 0.981 |
|                   |               |              | Delta              | 394   | 0.885 | 0.696  | 1.126 | 0.321 |
|                   |               | VAT          | Baseline           | 400   | 1.003 | 0.993  | 1.012 | 0.570 |
|                   |               |              | Time-varying       | 400   | 1.003 | 0.995  | 1.011 | 0.434 |
|                   |               |              | Delta              | 394   | 1.005 | 0.989  | 1.022 | 0.543 |
|                   | 1             | SMI          | Baseline           | 163   | 0.934 | 0.834  | 1.047 | 0.243 |
|                   |               |              | Time-varying       | 163   | 0.954 | 0.855  | 1.064 | 0.398 |
|                   |               |              | Delta              | 162   | 1.003 | 0.771  | 1.307 | 0.979 |
|                   |               | VAT          | Baseline           | 163   | 0.996 | 0.983  | 1.008 | 0.483 |
|                   |               |              | Time-varying       | 163   | 0.996 | 0.984  | 1.009 | 0.527 |
|                   |               |              | Delta              | 162   | 1.000 | 0.977  | 1.023 | 0.995 |
| 2 or 3            | SMI           | Baseline     | 64                 | 0.921 | 0.774 | 1.096  | 0.354 |       |
|                   |               | Time-varying | 64                 | 0.998 | 0.889 | 1.122  | 0.977 |       |
|                   |               | Delta        | 56                 | 0.614 | 0.375 | 1.005  | 0.052 |       |
|                   | VAT           | Baseline     | 64                 | 0.999 | 0.973 | 1.025  | 0.925 |       |
|                   |               | Time-varying | 64                 | 1.002 | 0.989 | 1.016  | 0.714 |       |
|                   |               | Delta        | 56                 | 0.984 | 0.947 | 1.023  | 0.430 |       |
| ER                | Positive      | SMI          | Baseline           | 470   | 0.943 | 0.873  | 1.019 | 0.137 |
|                   |               |              | Time-varying       | 470   | 0.965 | 0.899  | 1.036 | 0.321 |
|                   |               |              | Delta              | 462   | 0.829 | 0.672  | 1.023 | 0.080 |
|                   |               | VAT          | Baseline           | 470   | 1.002 | 0.993  | 1.011 | 0.697 |
|                   |               |              | Time-varying       | 470   | 1.002 | 0.995  | 1.009 | 0.660 |
|                   |               |              | Delta              | 462   | 1.001 | 0.983  | 1.019 | 0.923 |
|                   | Negative      | SMI          | Baseline           | 157   | 0.989 | 0.902  | 1.084 | 0.809 |
|                   |               |              | Time-varying       | 157   | 1.019 | 0.946  | 1.097 | 0.623 |
|                   |               |              | Delta              | 150   | 0.957 | 0.757  | 1.209 | 0.711 |
|                   |               | VAT          | Baseline           | 157   | 0.999 | 0.989  | 1.010 | 0.914 |
|                   |               |              | Time-varying       | 157   | 1.002 | 0.992  | 1.011 | 0.715 |
|                   |               |              | Delta              | 150   | 1.005 | 0.987  | 1.024 | 0.570 |

\*Adjusting variables such as lymphovascular invasion, histologic grade, T stage, N stage, estrogen receptor, progesterone receptor, Ki-67 and adjuvant chemotherapy, except the subgroup variable, <sup>†</sup>Adjusting not only the above variables but also the predictor variable at baseline. CI = confidence interval, ER = estrogen receptor, HER2 = human epidermal growth factor receptor 2, HR = hazard ratio, SMI = skeletal muscle index, VAT = visceral adipose tissue area
